# Supplementary material for: Applying Computerized-Scoring Models of Written Biological Explanations across Courses and Colleges: Prospects and Limitations
Source: Atypon-hosted journal article supplement (doi:10.1187/cbe.11-08-0081), 2011-12-01
Supplement: combinedsupmats.pdf [file combinedsupmats.pdf]

## Appendix

Specific SIDE settings for performing the analyses in this study include the following. First, the machine-learning algorithm was selected as “weka-classifiers-functions-SMO”; options included: (1) “unigrams”; (2) “treat above features as binary”; (3) “line length”; (4) “remove stopwords”; and (5) “stemming” (details of these features may be found in Mayfield and Rose`, 2010, p. 6). We also used the feature extractor plugin option “plugin.sample.fce.TagHelperExtractor”; This default option creates a feature table based upon the NLP extractions mentioned above. We also selected the “Remove rare features” option and set the value of 5, and, as noted above, chose the machine-learning algorithm “weka-classifiers-functions-SMO.” We selected Crossvalidation and set the value at 10. For the Default segmenter option, we selected “plugin.sample.segmenter.DocumentSegmenter” (Mayfield and Rose`, 2010).
